1 **Title:** HIV-1 co-receptor usage and variable loop contact impacts V3 loop bnAb susceptibility

2 **Running Title:** Co-receptor, variable loop contact, and neutralization sensitivity

3 **Authors:** Ludy Registre<sup>1,2</sup>, Yvetane Moreau<sup>2</sup>, Sila Toksoz Ataca<sup>1</sup>, Surya Pulukuri<sup>2</sup>, Timothy J.

4 Henrich<sup>3</sup>, Nina Lin<sup>2</sup>, Manish Sagar<sup>1,#</sup>

5 <sup>1</sup>Department of Microbiology, Boston University School of Medicine, Boston, MA;

6 <sup>2</sup>Section of Infectious Disease, Department of Medicine, Boston University School of Medicine,

7 Boston, MA;

8 <sup>3</sup>Division of Experimental Medicine, University of California, San Francisco, San Francisco, CA

9

10 **Short Title:** Sequence-based V3 loop bnAb sensitivity prediction

11

12 **#** Manish Sagar

13 [msagar@bu.edu](mailto:msagar@bu.edu)

14 The authors have declared that no conflict of interest exists

15 **ABSTRACT**

16 In clinical trials, HIV-1 broadly neutralizing antibodies (bnAbs) effectively lower plasma viremia  
17 and delay virus reemergence after antiretroviral treatment is stopped among infected individuals  
18 that have undetectable virus levels. Presence of less neutralization susceptible strains prior to  
19 treatment, however, decreases the efficacy of these antibody-based treatments. The HIV-1  
20 envelope glycoprotein harbors extensive genetic variation, and thus, neutralization sensitivity  
21 often cannot be predicted by sequence analysis alone. Sequence-based prediction methods are  
22 needed because phenotypic-based assays are labor intensive and not sensitive. Based on the  
23 finding that phenotypically confirmed CXCR4- as compared to exclusive CCR5-utilizing strains  
24 are less neutralization sensitive, especially to variable loop 1 and 2 (V1-V2) and V3 loop bnAbs,  
25 we show that an algorithm that predicts receptor usage identifies envelopes with decreased V3  
26 loop bnAb susceptibility. Homology modeling suggests that the primary V3 loop bnAb epitope is  
27 equally accessible among CCR5- and CXCR4-using strains although variants that exclusively  
28 use CXCR4 have V3 loop protrusions that interfere with CCR5 receptor interactions. On the  
29 other hand, homology modeling also shows that envelope V1 loop orientation interferes with V3  
30 loop directed bnAb binding, and this accounts for decreased neutralization sensitivity in some  
31 but not all cases. Thus, there are likely different structural reasons for the co-receptor usage  
32 restriction and the differential bnAb susceptibility. Algorithms that use sequence data to predict  
33 receptor usage and antibody-envelope homology models can be used to identify variants with  
34 decreased sensitivity to V3 loop and potentially other bnAbs.

35

36 **AUTHOR SUMMARY**

37 HIV-1 broadly neutralizing antibody (bnAb) therapies are effective, but the pre-existence of less  
38 susceptible variants may lead to therapeutic failure. Sequence-based methods are needed to  
39 predict pre-treatment variants' neutralization sensitivity. HIV-1 strains that use the CXCR4 as  
40 compared to the CCR5 receptor are less neutralization susceptible, especially to V1-V2 and V3  
41 loop bnAbs. A sequence-based algorithm that predicts receptor usage can identify envelope  
42 variants with decreased V3 loop bnAb susceptibility. While the inability to utilize the CCR5  
43 receptor maps to a predicted protrusion in the envelope V3 loop, this viral determinant does not  
44 directly influence V3 loop bnAb sensitivity. Furthermore, homology modeling predicted contact  
45 between the envelope V1 loop and an antibody also impact V3 loop bnAb susceptibility in some  
46 but not all cases. An algorithm that predicts receptor usage and homology modeling can be  
47 used to predict sensitivity to bnAbs that target the V3 loop and potentially other envelope  
48 domains. These sequence-based methods will be useful as HIV-1 bnAbs enter the clinical  
49 arena.

## 50 INTRODUCTION

51 Multiple broadly neutralizing antibodies (bnAbs) are being examined as novel  
52 therapeutics against human immunodeficiency virus type 1 (HIV-1) infection [1-6]. In contrast to  
53 the current highly effective antiretroviral drugs (ARVs), antibody-based therapies require less  
54 frequent dosing, can be effective against drug resistant variants, and may potentiate host  
55 humoral responses [7]. Prior to initiating ARVs, HIV-1 infected patients are routinely evaluated  
56 for the presence of drug resistant strains, primarily using sequence-based methods [8].  
57 Sequence-based methods are also needed to identify pre-treatment variants with reduced bnAb  
58 susceptibility because phenotypic-based assays are cumbersome and lack sensitivity [1,4].

59 BnAbs attach to diverse envelope (Env) domains, such as the apex, high mannose  
60 patch, CD4 binding site (bs), surface unit (gp120) – transmembrane (gp41) interface, and gp41  
61 membrane proximal external region (MPER) [9]. The apex is targeted by variable loop 1 and 2  
62 (V1-V2) directed bnAbs that bind the asparagine (N)-linked glycan at Env position 160 (N160)  
63 [10]. Anti-variable loop 3 (V3 loop) bnAbs attach to an N-linked glycan at Env position 332 in the  
64 high mannose patch [11]. While the activity of these bnAbs primarily depends on the presence  
65 of these glycans, other amino acids, especially those in and around the V1-V2 and V3 Env  
66 regions, also impact neutralization [12,13]. In addition to being antibody targets, the V1-V2 and  
67 V3 loops also influence binding to either the CCR5 or CXCR4 co-receptor, and this attachment  
68 is necessary for host cell entry [14-16]. This overlap provides the scientific basis for speculating  
69 that there is an association between the receptor a virus utilizes to enter cells and its bnAb  
70 sensitivity. We and others have previously shown that HIV-1 subtype C (HIV-1C) and HIV-1  
71 subtype D (HIV-1D) variants that exclusively utilize the CXCR4 receptor (termed X4) often have  
72 insertions or basic amino acid substitutions in the V3 loop compared to the strains that either  
73 only use CCR5 (classified as R5) or those that can employ either receptor (termed R5X4)  
74 [14,15]. Our group and others have also argued that certain antibody responses may select for

75 CXCR4-utilizing variants [17-19]. Even though, the sequence signatures associated with X4  
76 strains do not involve the primary V1-V2 and V3 bnAb epitopes, associated sequence  
77 modifications and possible linked structural changes may impact bnAb susceptibility. Both V3  
78 loop sequence motifs and structure-based models have been used to predict CCR5 and CXCR4  
79 usage, and thus, similar methods could potentially be used to speculate about bnAb sensitivity  
80 [20-22]. In this study, we show that co-receptor usage prediction can be used to identify Envs  
81 with decreased susceptibility to V3 loop bnAbs. Furthermore envelope-antibody homology  
82 models predict antibody sensitivity in some cases, and these types of sequence-based methods  
83 could be used to predict bnAb susceptibility in the future.

## 84 **Results**

### 85 **CXCR4- as compared to CCR5-using strains are more neutralization resistant.**

86 Observing an association between co-receptor usage and bnAb susceptibility could be  
87 useful in developing sequence-based methods to determine pre-treatment bnAb sensitivity  
88 because there are numerous algorithms that predict receptor utilization based on input  
89 sequence alone. Some prior studies have suggested that HIV-1B CXCR4- as compared to  
90 CCR5-using viruses are more neutralization susceptible [23-27]. If true, CXCR4-utilizing strains  
91 should predominantly exist in individuals that have decreased neutralization capacity. We tested  
92 this prediction by comparing neutralization breadth and potency among plasma samples  
93 collected from individuals with previously well-characterized virus population [28]. Neutralization  
94 responses were compared among eleven individuals with no evidence of CXCR4-using virus  
95 (classified as R5 only) and seven subjects with a mixture of CXCR4 and CCR5 utilizing variants  
96 (termed dual-mixed (DM)) (Table S1). Samples were classified either as R5 only or as DM if the  
97 absence or the presence of CXCR4-using virus was confirmed by a bulk Env phenotype assay  
98 and in some cases by the analysis of individual Envs isolated using single genome amplification  
99 (SGA) also [28]. Samples' neutralization capacity was assessed against eleven R5 Envs of

100 varying subtypes because responses against this global reference panel have been previously  
101 used to estimate neutralizing breadth and potency [29,30]. Heat maps depicting the  
102 neutralization responses against the eleven Envs revealed that the individuals from the two  
103 groups were not qualitatively different (Fig. 1A). Plasma neutralization capacity was estimated  
104 using a previously defined breadth and potency (BP) score [30]. Briefly, BP score consisted of  
105 the average log normalized percent neutralization at the highest tested plasma dilution (1:50)  
106 across all the viruses in the panel. DM plasma had similar BP as compared R5 only plasma ( $p =$   
107 0.37) (Fig 1B). The percentage of the eleven Env reference panel neutralized at greater than  
108 50% (termed breadth) was also similar between the DM as compared to the R5 only samples ( $p$   
109 = 0.88) (Fig 1C). Interestingly, DM plasma (4102 and 1239) with demonstrated X4 variants  
110 (Table S1) had some of the most potent (BP score 0.92 and 0.57) and greatest neutralization  
111 breadth (100% and 82%) (Fig. 1A).

112 It is possible that we may have failed to observe a difference among the DM as  
113 compared to the R5 samples because of the relatively small sample size. In our analysis there  
114 was 80% power, at type 1 error level of 0.05, to detect around 1.5 fold or greater difference in  
115 the median BP score based on the observed distributions. DM as compared to the R5 only  
116 plasma may have also potentially failed to demonstrate neutralization capacity differences  
117 because the global reference panel contained R5 Envs only [29]. Neutralization capacity was  
118 examined against another Env collection consisting of CXCR4-using variants (Table S2) [14,31].  
119 DM and R5-only plasma had similar neutralization fingerprints against this CXCR4-using Env  
120 collection (Fig 1D), and there was no significant difference in BP score ( $p = 0.22$ ) (Fig 1E) or  
121 breadth ( $p = 0.83$ ) (Fig 1F). In aggregate, HIV-1B CXCR4-using viruses do not predominantly  
122 exist among individuals with weak humoral immune responses.

123 Studies from our group and others have argued that CXCR4-using variants may emerge  
124 as a consequence of antibody pressure because X4 as compared to R5 Envs are more

125 neutralization resistant [17-19]. We compared the eleven R5 only and seven DM plasma's  
126 neutralization capacity against Envs in the reference global panel (all R5) to those in the  
127 CXCR4-using collection to provide further generalizability for this conclusion. The eighteen  
128 plasma had decreased neutralization capacity (around 1.5 fold lower BP score) against the  
129 CXCR4-using as compared to against the global reference Env panel ( $p = 0.01$ ) (Fig 1G).  
130 Furthermore, neutralization breadth was significantly lower against the CXCR4-using as  
131 compared to the global reference Env collection ( $p = 0.02$ ) (Fig 1H). These observations  
132 suggest that, in general, HIV-1B CXCR4- as compared to CCR5-using viruses are more  
133 neutralization resistant. Thus, there is an association between co-receptor usage and  
134 neutralization sensitivity.

#### 135 **X4 variants are less neutralization susceptible to V1-V2 and V3 bnAbs**

136 The linkage between co-receptor usage and neutralization susceptibility was examined  
137 in further detail by comparing available bnAb  $IC_{50}$ s among variants with phenotypically-  
138 confirmed co-receptor usage in the Los Alamos CATNAP database [32]. A larger proportion of  
139 the CXCR4-using as compared to R5 variants had an  $IC_{50}$  above the highest tested bnAb  
140 concentration for the V3 directed glycan bnAb, PGT121 ( $p < 0.0001$ ), the V1-V2 glycan  
141 dependent bnAbs, PG9 ( $p = 0.02$ ) and PG16 ( $p = 0.03$ ), but not for the CD4bs bnAb, VRC01 ( $p$   
142  $= 0.95$ ). The tested but undetectable  $IC_{50}$ s were given a value of 100 for the subsequent  
143 statistical comparisons. The CXCR4-utilizing variants had significantly higher  $IC_{50}$  to PGT121, as  
144 compared to the R5 strains ( $p = 0.0002$ ) (Fig. 2A). The R5 variants also had significantly lower  
145  $IC_{50}$ s to PG9 ( $p = 0.03$ ) and PG16 ( $p = 0.04$ ) as compared to the CXCR4-using strains (Fig. 2B  
146 and 2C). On the other hand, CXCR4-using variants and R5 had similar neutralization  
147 susceptibility to VRC01 ( $p = 0.26$ ) (Fig. 2D). Meaningful comparisons could not be done for  
148 another V3 (10-1074) and a MPER (10E8) bnAb because of low number of CXCR4-using  
149 variants with available  $IC_{50}$  data in the CATNAP database ( $n = 9$  each). These observed

150 neutralization differences to PGT121, PG9, and PG16 remained statistically significant even if  
151 R5 variants were compared to X4 strains only. A small number of R5X4 variants with available  
152 IC<sub>50</sub> data precluded their examination as an independent group.

153         The CXCR4-using variants available in the Los Alamos database are often lab-adapted  
154 strains, and neutralization characteristics can change with lab passaging [33,34]. Thus,  
155 neutralization susceptibility was compared among primary Envs with phenotypically determined  
156 co-receptor usage. A total of 929 individual Envs (median = 16 Envs per subject, range= 1-239)  
157 were isolated using SGA from 33 previously classified DM anti-retroviral naïve patient samples  
158 [28,35]. A web-based prediction tool, either WebPSSM or geno2pheno, was used to predict the  
159 co-receptor usage of the isolated Envs based on the V3 loop sequence [21,22]. Some of the  
160 SGA Envs from 22 individuals were genotypically predicted to use CXCR4, and predicted  
161 CXCR4-utilizing Envs were likely not isolated from the other eleven previously characterized DM  
162 samples because of relatively limited SGA sampling compared to the bulk PCR analysis.  
163 Receptor usage phenotype was examined for some viruses that incorporated SGA isolated  
164 Envs from the seventeen samples containing sequence predicted CXCR4-utilizing strains  
165 (Table 1). Five (4102, 1239, 3248, 1924, and 3576) contained X4 Envs, and a primary X4 Env  
166 group was generated by randomly selecting one variant from each of the 5 individuals (Table  
167 S3). The Envs examined from the remaining twelve samples were either R5, even though some  
168 of them were predicted by sequence to use the CXCR4 receptor, or a mixture of R5X4 and R5  
169 (Table 1). A primary R5 Env group was also generated by randomly selecting 1 phenotypically  
170 confirmed CCR5 only using strain from 11 different individuals (Table S3).

171         Neutralization susceptibility was compared between the group of primary X4 and R5  
172 Envs to a standard comparator generated by pooling plasma from ten HIV-1B infected  
173 individuals, different from the seventeen subjects above. We chose to compare the groups

174



175 **Table 1. Subject envelope characteristics.**

176

| Subject | # of SGA Envs isolated | # of SGA Envs with predicted genotype |       | # of Envs phenotyped | # of recombinant viruses with confirmed phenotype |    |       |
|---------|------------------------|---------------------------------------|-------|----------------------|---------------------------------------------------|----|-------|
|         |                        | R5                                    | CXCR4 |                      | R5                                                | X4 | R5/X4 |
| 4102    | 61                     | 52                                    | 9     | 19                   | 13                                                | 5  | 1     |
| 1239    | 239                    | 234                                   | 5     | 12                   | 9                                                 | 1  | 2     |
| 3248    | 16                     | 0                                     | 16    | 9                    | 0                                                 | 9  | 0     |
| 1924    | 27                     | 24                                    | 3     | 2                    | 1                                                 | 1  | 0     |
| 3576    | 30                     | 0                                     | 30    | 6                    | 0                                                 | 6  | 0     |
| 3131    | 17                     | 6                                     | 11    | 7                    | 7                                                 | 0  | 0     |
| 1069    | 10                     | 0                                     | 10    | 9                    | 9                                                 | 0  | 0     |
| 2327    | 6                      | 0                                     | 6     | 4                    | 1                                                 | 0  | 3     |
| 0229    | 40                     | 5                                     | 35    | 7                    | 3                                                 | 0  | 4     |
| 1045    | 15                     | 5                                     | 10    | 5                    | 5                                                 | 0  | 0     |
| SC      | 11                     | 7                                     | 4     | 6                    | 5                                                 | 0  | 1     |
| 1389    | 14                     | 0                                     | 14    | 7                    | 1                                                 | 0  | 5     |
| 1486    | 15                     | 7                                     | 8     | 5                    | 5                                                 | 0  | 0     |
| 3026    | 110                    | 109                                   | 1     | 4                    | 4                                                 | 0  | 0     |
| 1233    | 98                     | 72                                    | 26    | 10                   | 7                                                 | 0  | 0     |
| 9265    | 14                     | 0                                     | 14    | 14                   | 0                                                 | 0  | 14    |
| 1874    | 11                     | 2                                     | 9     | 5                    | 5                                                 | 0  | 0     |

177 using neutralization area under the curve (AUC) rather than the concentration required to

178 achieve 50% inhibition ( $IC_{50}$ ) because the two estimates are highly correlated and AUC can be

179 used when 50% inhibition is not observed at the highest tested concentration [30,36] (Fig. S1).

180 The HIV-1B primary X4 Envs had a two-fold lower AUC as compared to the R5 group ( $p = 0.03$ )

181 (Fig 2E). The primary X4 as compared to R5 variants were around 4 to 8 fold less sensitive to  
182 V3 directed antibodies PGT121 and 10-1074 although the differences only showed a statistical  
183 trend likely due to small sample size ( $p = 0.09$  for both) (Fig 2F and 2G). The primary X4 viruses  
184 were around 2 fold less sensitive to V1-V2 antibodies, PG9 and PG16, but these differences  
185 were also not statistically significant (Fig. 2H and 2I). In contrast, the R5 as compared to the X4  
186 variants had comparable sensitivity to CD4bs and MPER bnAbs (Fig 2J and 2K). Thus, similar  
187 to our HIV-1C findings and Los Alamos CATNAP database analysis, primary HIV-1B X4 as  
188 compared to R5 variants have decreased neutralization susceptibility, especially to V3 and  
189 possibly V1-V2 directed antibodies [18]. Thus, algorithms that predict co-receptor usage can  
190 potentially be utilized to estimate V3 and potentially V1-V2 bnAb sensitivity.

191 **V3 loop protrusions impact CCR5 receptor interactions but not access to the V3 loop**  
192 **bnAb epitope.**

193 Modification of the glycosylated amino acid at Env position 332 is the primary resistance  
194 determinant for V3 directed bnAb, but decreased sensitivity can arise even if this epitope  
195 remains intact [3,12]. All the R5 and X4 variants that were compared for their neutralization  
196 susceptibility to PGT121 and 10-1074 (Fig. 2F and 2G) had a predicted glycan at position 332.  
197 A sequence alignment of 22 X4, 31 R5X4, and 77 R5 primary Envs with phenotypically  
198 confirmed receptor usage revealed that all X4 variants, except 1924, contained a 2 to 3 amino  
199 acid V3 loop insertion either directly before the glycine (G) – proline (P) - G crown or toward the  
200 base of the V3 loop (Fig. S2). These specific V3 modifications were not found in any of the  
201 phenotypically confirmed R5 Envs. In contrast, the X4 variant in subject 1924 contained a  
202 positively charged amino acid substitution at V3 loop position 25. This change has previously  
203 been associated with CXCR4 receptor usage, although this sequence motif is not as highly  
204 predictive for exclusive CXCR4 usage as the V3 loop insertion [14,21].

205 We hypothesized that this observed V3 loop sequence motif associated with X4 strains  
206 likely restricted both co-receptor usage and access the primary V3 loop bnAb epitope, namely  
207 the glycan at position 332. Structural homology models were used to assess this premise. The  
208 predicted V3 loop structure of X4 Envs (1239, 1924, 4102, 3248 and 3576) was either  
209 compared to a co-circulating R5 variant (1239, 1924, and 4102) or a heterologous R5 strain  
210 (1233). Superimposed Env structures revealed a secondary protrusion in all the phenotypically  
211 confirmed X4 V3 loops as compared to the R5 V3 loop Envs (Fig 3A - 3E). This protuberance  
212 coincided with the location of the insertion either at the tip or the base of the V3 loop (Fig. S2).  
213 The 1924 X4 V3 loop also contained a protrusion in the V3 loop in the absence of an insertion  
214 (Fig. 3E). The protuberance directly corresponded to the observed aspartic acid (D) to lysine (K)  
215 substitution at position 25 of the V3 loop compared to the R5 variant.

216 To understand the impact of these protrusions on co-receptor usage, the predicted V3  
217 loop structure was docked with a model of the CCR5 receptor. Although an experimentally  
218 solved CCR5 structure is available, this structure is in complex with Maraviroc, an HIV entry  
219 inhibitor, which alters the Env binding pocket [37]. Thus, this solved CCR5 structure is unusable  
220 for understanding interactions with the Env V3 loop. A previously constructed structural model of  
221 CCR5 created on a CXCR4 template was used in our subsequent analysis [38]. Receptor -  
222 ligand interactions for CCR5 and a 4102 R5 V3 loop Env were predicted using Cluspro [39]. In  
223 these simulations, R5 V3 loops interacted with CCR5 in an expected manner (Fig. S3) [38].

224 All docking studies of CCR5 and the predicted X4 V3 loop put the X4 V3 loop in  
225 orientations that did not interact with the CCR5 receptor. In order to predict the interaction  
226 between CCR5 and an X4 V3 loop, the X4 V3 loop model was superimposed onto the predicted  
227 CCR5 - 4102 R5 V3 loop model complex (Fig. 3F - 3H). The R5-utilizing V3 loop was then  
228 removed for visual clarity. In this model, the 4102 X4 Env V3 loop crown, specifically the amino  
229 acid insertions, clashed with Methionine (M) 279 and Glutamic acid (E) 280 in the CCR5 extra-

230 cellular loop 2 (ECL2) (Fig. 3F). On the other hand, subject 3248 X4 Env with the insertion at  
231 the base of the V3 loop eliminated two hydrogen bonds known to be important for CCR5  
232 binding, namely V3 Arginine (R) 3 to CCR5 Aspartic acid (D) 11 and V3 R23 to CCR5 E18 (Fig.  
233 3G) [38]. These two important hydrogen bonds were also not observed for the 1924 X4 V3 loop  
234 with the predicted protrusion (Fig. 3H). Together, these structural modeling data suggest that  
235 signature V3 sequence motifs observed in X4 strains introduce a protrusion that either sterically  
236 hinders receptor binding or eliminates important interactions with amino acids in the CCR5 N-  
237 terminal region.

238           Next, homology models were used to understand the impact of the X4 Envs V3 loop  
239 insertion related protrusions on V3 loop bnAb access. First, Env structures were predicted using  
240 SWISS-MODEL with Env BG505-SOSIP-gp140 as the template [40]. Next within PyMOL, the  
241 predicted models were superimposed on the crystal structure of a BG505-SOSIP in complex  
242 with either 3H+109L (PDB ID 5CEZ) or 10-1074 (PDB ID 5T3Z) [41,42]. The PGT121 precursor,  
243 3H+109L, structure was chosen in the homology modeling because PGT121 structure has not  
244 been solved in conjunction with Env gp120 subunit. In addition, the epitope binding region for  
245 3H+109L and PGT121 (PDB ID 4FQ1) have relatively small root-mean-square-deviation (RMSD  
246 = 1.37 Å) and similar angle of approach towards the Env (Fig. S4). Homology models revealed  
247 that the targeted V3 loop epitope was equally accessible to the PGT121 precursor and 10-1074  
248 in the relatively resistant insertion containing X4 (4102-3\_6 and 4102-3\_5) and relatively  
249 sensitive insertion deficient R5 Envs (4102-61 and 4102-2\_17) (Fig. 4A – 4D and Table 2).  
250 Thus, the V3 loop insertion related protrusion hinders CCR5 binding, but it does not appear to  
251 limit access to the V3 loop bnAb epitope.

## 252 **Contact between the V1 loop and the bnAb impacts susceptibility.**

253 The homology models also revealed that the V1 loop of the highly sensitive Envs, pointed away  
254 from the PGT121 precursor and the 10-1074 bnAb (Fig. 4). On the other hand, the V1 loop of

255 the relatively resistant Envs clashed with the antibodies. These structural homology models  
256 suggested that V1 loop clash impacts V3 loop bnAb sensitivity. To validate this hypothesis, we  
257 engineered chimeric Envs in which the V1-V2 loops were swapped from 4102

258 **Table 2. Original and chimeric Env neutralization sensitivity and CSA**

| Env ID     | Phenotype | PGT121<br>(AUC) | 10-1074<br>(AUC) | 3H+109L<br>CSA (A <sup>2</sup> ) | 10-1074<br>CSA (A <sup>2</sup> ) |
|------------|-----------|-----------------|------------------|----------------------------------|----------------------------------|
| 4102-61    | R5        | 0.75            | 0.73             | 324.24                           | 236.56                           |
| 4102-3_6   | X4        | 0.24            | 0.56             | 910.51                           | 869.91                           |
| 4102-2_17  | R5        | 0.64            | 0.65             | 317.61                           | 256.98                           |
| 4102-3_5   | X4        | 0.30            | 0.33             | 1270.90                          | 1150.58                          |
| 3_6H-61T   | R5        | 0.24            | 0.55             | 861.24                           | 818.44                           |
| 61H-3_6T   | X4        | 0.41            | 0.64             | 769.71                           | 511.05                           |
| 3_5H-2_17T | R5        | 0.20            | 0.34             | 1057.91                          | 771.96                           |
| 2_17H-3_5T | X4        | 0.35            | 0.51             | 583.17                           | 403.39                           |

259  
260 R5 viruses highly sensitive to PGT121 (4102-61 and 4102-2\_17) and X4 variants relatively  
261 resistant to the bnAb (4102-3\_6 and 4102-3\_5). Chimeras contained exchanged domains from  
262 the start of the Env gene to the end of V1-V2 (labeled head (H)) and from the V1-V2 terminus to  
263 Env end (termed tail (T)). Both relatively resistant variants' V3 loop bnAb susceptibility  
264 increased after the introduction of V1-V2 loops from the highly sensitive Envs (Table 2). In  
265 contrast, both highly sensitive R5 Envs PGT121 and 10-1074 sensitivity decreased after the  
266 introduction of the X4 V1-V2 domains. These swaps yielded Envs that were not as highly  
267 susceptible or as relatively resistant as the original non-chimeric strains. Furthermore, the V1-  
268 V2 exchanges did not switch receptor usage. In aggregate, this suggests that V1-V2 domain

269 impact sensitivity to V3 loop bnAbs but other Env portions, such as the V3 loop, are also likely  
270 to make important contributions.

271 The influence of Env V1 loop orientation was further examined by estimating the contact  
272 surface area (CSA) between a predicted Env V1 structure and an antibody. In this context,  
273 higher CSA implied greater proximity of the V1 loop to the antibody and vice versa. Within  
274 PyMOL, the CSA was estimated as the sum of the solvent accessible area for the antibody and  
275 V1 loop structure individually minus the solvent accessible area for the V1 loop in complex with  
276 the antibody [43]. As expected from the predicted structures (Fig 4), the relatively resistant X4  
277 (4102-3\_6 and 4102-3\_5) Envs had greater CSA as compared to the highly sensitive R5 (4102-  
278 61 and 4102-2\_17) R5 Envs (Table 2). Among the original and chimeric Envs, the estimated  
279 CSA increased as neutralization PGT121 and 10-1074 AUC decreased (Fig. 5A and 5B). Thus,  
280 Envs predicted to have greater V1 loop proximity to the antibody are more neutralization  
281 resistant. To further confirm this association, 3H+109L and 10-1074 CSA was estimated for all  
282 Envs in the CATNAP database with a predicted N332 site. There was a statistically significant  
283 association between estimated CSA and bnAb sensitivity among Envs that had a detectable  $IC_{50}$   
284 (Fig. 5C and 5D). As CSA increased, sensitivity to PGT121 and 10-1074 decreased. In  
285 aggregate, this suggests that CSA can be used to estimate V1 loop clash with an antibody, and  
286 V1 loop interference impacts neutralization susceptibility to V3 loop bnAb.

### 287 **Sequence-derived co-receptor usage but not CSA can be used to predict V3 loop bnAb** 288 **sensitivity**

289 In a future sequence-based screen, individuals harboring strains that lack a predicted  
290 glycan at the Env 332 site will likely be ineligible for V3 loop directed bnAb therapy. Numerous  
291 Envs that have the N332 site, however, still have decreased neutralization sensitivity to V3 loop  
292 bnAbs, and there are no sequence-based methods to identify these variants. We hypothesized  
293 that an algorithm that predicts co-receptor usage and estimated CSA between V1 loop and V3

294 loop bnAb may help distinguish less susceptible strains. The CRUSH (CoReceptor USage  
295 prediction for HIV-1) web tool was used to predict receptor utilization among all CATNAP  
296 database N332 containing Envs with neutralization data against either PGT121 or 10-1074 [20].  
297 This highly accurate algorithm yields a probability that an input V3 Env sequence is X4.  
298 Previous clinical trials have used an  $IC_{50}$  below 2 ug/ml as an inclusion criteria for V3 loop bnAb  
299 based therapy, and thus, Envs were classified as sensitive and resistant based on this criterion  
300 [1,4]. The ability of CRUSH and V1 CSA to predict PGT121 and 10-1074 susceptibility among  
301 N332 containing Envs was initially examined by using receiver operating curves (ROC). CRUSH  
302 and V1 CSA yielded a median area under the ROC of 0.68 (95% confidence interval (CI) 0.61 –  
303 0.75,  $p < 0.0001$ ) and 0.55 (95% CI 0.48 – 0.61,  $p = 0.14$ ) respectively for PGT121 ( $n = 338$ )  
304 (Fig. 5E). For 10-1074, there was also a statistically significant area under the ROC for CRUSH  
305 (median 0.66, 95% CI 0.57 – 0.75,  $p = 0.0006$ ) but not for V1 CSA (median 0.55, 95% CI 0.46 –  
306 0.65,  $p = 0.25$ ) ( $n = 289$ ) (Fig. 5F).

307 For both PGT121 and 10-1074, 175 CATNAP Envs were randomly selected as a training  
308 set to determine a CRUSH cut-off that would achieve a minimum 90% specificity for predicting  
309 an  $IC_{50}$  greater than 2 ug/ml. The remaining 163 and 114 Envs were used as a test set for  
310 PGT121 and 10-1074 respectively. In both cases, a CRUSH value more than 0.16 yielded  
311 greater than 90% specificity for the test set. This CRUSH cut-off had 93.0% (95% CI 89 – 96%)  
312 and 91% (95% CI 87 – 94%) specificity for PGT121 and 10-1074 respectively against the entire  
313 CATNAP data set. The positive predictive value (PPV) was 65% for PGT121 but only 33% for  
314 10-1074 (Fig. 5G and 5H). This difference likely occurred because there were smaller number of  
315 CATNAP Envs with a CRUSH value greater than 0.16 with available  $IC_{50}$  data against 10-1074  
316 ( $n = 33$ ) as compared to PGT121 ( $n = 48$ ), and PPV as opposed to specificity is dependent on  
317 sample composition. In both cases, however, the proportion of N332 positive Env variants with a  
318 CRUSH score greater than 0.16 had between 2 to 3 fold greater likelihood of having an V3 loop

319 bnAb IC<sub>50</sub> more than 2 ug/ml as compared to strains with predicted glycosylation at the 332  
320 amino acid position but less than 16% probability of being X4 (Fig. 5G and 5H). Similar analysis  
321 was not conducted for CSA because it demonstrated poor test characteristics against the entire  
322 data set. In aggregate, Envs both containing the predicted primary V3 loop bnAb epitope (N332)  
323 and estimated to have greater than 16% probability of being an X4 variant had a relatively high  
324 likelihood of being relatively insensitive to PGT121 and 10-1074.

## 325 **Discussion**

326       Passive administration of a V3 loop bnAb (10-1074) decreases plasma viremia and  
327 delays virus re-emergence in some but not all treated individuals [1,3,4]. In these trials, pre-  
328 infusion virus susceptibility impacted subsequent treatment efficacy regardless of whether 10-  
329 1074 was used as monotherapy or in combination with another bnAb. These results provide the  
330 impetus to develop techniques to screen pre-existing variants for bnAb neutralization sensitivity.  
331 In this study, we used the observation that phenotypically-confirmed CXCR4-using as compared  
332 to R5 variants are less neutralization susceptible to heterologous plasma and to V1-V2 and V3  
333 directed bnAbs to develop such a screening test. As an application of these results, we showed  
334 that an algorithm that uses sequences to predict receptor usage identifies variants with  
335 decreased susceptibility to V3 loop bnAbs. We also developed sequence-input homology  
336 models of envelope – antibody interactions. We found that in some cases less neutralization  
337 susceptible variants have relatively large estimated contact surface between the Env V1 loop  
338 and antibody, suggesting that variable loop interference may impact bnAb potency. In  
339 aggregate, these results provide an initial sequence-based method to screen for V3 loop  
340 insensitive viruses. Although, CSA does not reliably predict neutralization sensitivity among a  
341 large set of Env variants, this sequence-dependent homology modeling provides a potential  
342 framework for developing future sequence-based tests for estimating bnAb sensitivity. This will  
343 be helpful for the various other planned bnAb clinical trials [44].



344 Most bnAb clinical trials have not pre-screened patients for antibody susceptibility [1-6].  
345 Phenotypic screening using culture outgrowth techniques or Env amplification, cloning and  
346 pseudovirus production is both time and labor intensive. Importantly, phenotypic screening has  
347 low sensitivity because these methods sample a relatively small proportion of the circulating Env  
348 variants, and they may miss minor strains that are less susceptible to the bnAb under  
349 consideration [34]. It is generally agreed that a sequence-based test aimed at identifying  
350 individuals that harbor V3 loop bnAb resistant strains would first exclude those that harbor  
351 variants lacking a predicted glycan at the Env 332 site. Indeed using 2 ug/ml as a cut-off,  
352 absence of a predicted glycan at the 332 site, classified as a positive test, has around 90% and  
353 98% specificity for identifying PGT121 and 10-1074 less sensitive strains respectively. Thus,  
354 this initial screen effectively excludes insensitive and some rare sensitive variants that lack the  
355 N332 site. Presence of the N332 glycan (a negative result), however, has a sensitivity of around  
356 64% and 78% for PGT121 and 10-1074 respectively, suggesting that a significant proportion of  
357 the variants with the N332 site are insensitive to the V3 loop bnAbs. Our results provide novel  
358 ways to parse out these N332 containing less sensitive strains. N332 positive variants with an  
359 estimated 16% or greater probability of being an X4 strain (CRUSH score > 0.16) have around  
360 two to three fold higher likelihood of having an IC<sub>50</sub> greater than 2 ug/ml as compared to the  
361 remaining N332 positive Envs. This CRUSH test, however, had relatively low PPV because only  
362 a small proportion of N332 positive strains in the CATNAP database had a CRUSH score  
363 greater than 0.16. The CATNAP database, however, may not be representative of the variants  
364 present in patients eligible for V3 directed bnAb therapy. In the CATNAP database, less than  
365 10% of the variants were either phenotypically confirmed or predicted by sequence analysis to  
366 use the CXCR4 receptor. Natural history studies, however, estimate that often up to 50% of  
367 chronically infected individuals contain CXCR4-using viruses [45,46]. Thus, using a CRUSH cut-  
368 off as a criteria for determining the eligibility of patients for V3 loop bnAb therapy may be

369 especially useful in settings where there is higher prevalence of X4 strains or of variants that are  
370 evolving towards CXCR4 utilization.

371 While specific V3 loop sequence changes are associated with R5 as compared to CXCR4-  
372 using strains, the differential neutralization susceptibility likely arose due to both V3 and non-V3  
373 loop modifications. The V3 loop – CCR5 docking and Env – antibody homology models along  
374 with V1-V2 chimeric Env studies support this idea. We showed that a predicted protrusion near  
375 the crown of the X4 V3 loop clashed with CCR5 receptor amino acids. On the other hand, the  
376 basic amino acid substitution or protrusion at the base or middle of the X4 V3 loop eliminated  
377 important interactions with amino acids in the CCR5 N-terminal region. Prior studies have found  
378 differences in charge, hydrogen-bond donor sites, aliphatic side chain orientation, and  
379 hydrophobicity as potential explanations for co-receptor specificity [38,47-49]. This study  
380 provides a novel mechanistic understanding for the loss of CCR5 receptor usage among some  
381 exclusive CXCR4-using Envs. Env – antibody homology models predict that these V3 loop  
382 protrusions present in X4 variants, however, do not directly limit access to the epitopes  
383 important for V3 loop directed bnAb activity. Thus, the structural basis for the inability to use the  
384 CCR5 receptor does not account for decreased sensitivity to V3 loop bnAbs. Our observation  
385 that exchanging V1-V2 loops among Envs did not change co-receptor usage but it did impact  
386 sensitivity to V3 loop bnAbs further supports this notion.

387 The sequential co-receptor evolution from R5 to R5X4 and then X4 requires multiple  
388 sequence modifications within and outside the V3 loop [50]. We observed that Env variants with  
389 merely greater than 16% probability of being X4 had a high likelihood of having a V3 loop bnAb  
390  $IC_{50}$  greater than 2  $\mu$ g/ml. Majority of Env strains with around 16% X4 probability likely use the  
391 CCR5 and not the CXCR4 receptor to enter cells. These Env variants, however, likely contain  
392 some sequence modifications that are commonly observed among CXCR4-using strains. As  
393 opposed to only the specific V3 loop differences among R5 versus X4 strains, it is likely that the

394 multitude of changes that occur as an Env transitions from exclusive CCR5 to only CXCR4  
395 usage contribute to decreasing sensitivity to V3 loop bnAbs.

396 The V3 loop sequence changes that lead to the predicted protrusions are similar to those  
397 observed among HIV-1C, HIV-1D and simian human immunodeficiency virus (SHIV) X4 strains  
398 [14,15,51]. The HIV-1B X4 had a 2 to 3 amino acid V3 loop insertion in the same two general  
399 regions, either directly before the GPG crown or towards the base of the V3 loop. Forces  
400 promoting V3 insertions remain unclear. Neutralizing antibody (nAb) selective pressure has  
401 been associated with insertions observed in V1 thru V4 Env domains [52-54]. Strain specific V3  
402 loop directed antibodies that bind at the crown or the base of the V3 loop are common in HIV-1  
403 infected individuals [55,56]. BnAbs, such as PGT121 and 10-1074, also interact with residues in  
404 and around the tip of the V3 loop including the GPG crown and amino acids towards the base of  
405 the V3 loop respectively [57]. In aggregate, the similarity in the V3 loop insertions among HIV-  
406 1B, HIV-C, and HIV-1D X4 variants suggests that these highly divergent viruses are  
407 independently converging to a similar solution in response to a common selection pressure,  
408 likely nAbs. Isolating antibodies from individuals that harbor X4 strains with V3 loop insertions  
409 will provide more definitive proof for this notion.

410 In general, plasma samples displayed a decreased ability to neutralize Envs in the CXCR4-  
411 using as compared to the global reference panel. The global reference Env collection has been  
412 proposed as a standardized panel to evaluate neutralization capacity [29]. This panel, however,  
413 contains no CXCR4-utilizing viruses. Our results argue that CXCR4-using, especially X4 strains,  
414 should be included in a standardized Env collection for a more accurate assessment of plasma  
415 or antibody neutralization breadth and potency. This may not be important for judging the  
416 breadth and potency of potential vaccine generated antibodies because nearly all infections are  
417 initiated by R5 strains [16,45,46]. Incorporating CXCR4 variants in the standard panel to

418 estimate neutralization capacity, however, will be important for potential future antibody-based  
419 therapeutics because chronically infected individuals often harbor CXCR4-using strains. [45,46].

420 Homology modeling was also used to gain a structural understanding for the linkage  
421 between differential neutralization susceptibility and co-receptor usage. The modeling and  
422 chimeric Env analysis suggested that the orientation of the V1 loop plays a role in influencing  
423 susceptibility to V3 loop directed bnAbs. Notably, these findings further confirm that Env V1-V2  
424 loops have a major impact on sensitivity to autologous, heterologous, and now bnAbs [58,59].  
425 Similar structure-based predictions that also incorporate interactions between different amino  
426 acids have been used to understand HIV-1 co-receptor usage [20,38]. As nAbs are introduced  
427 in the clinical arena, screening tests can use Env sequences to both predict a phenotype of  
428 interest, such as receptor usage, and develop homology structures that incorporate CSA and  
429 also electrostatic interactions between different amino acid pairs. This may yield even better  
430 sequence-based tests for predicting susceptibility to V3 loop and other bnAbs.

## 431 **Methods and Material**

### 432 **Study design and samples**

433 This study was classified as non-human subject research by the Boston University Institutional  
434 Review Board. Plasma samples were obtained from the AIDS Clinical Trials Group (ACTG)  
435 Study A5095, which was a randomized, double-blind trial assessing different ARV regimens  
436 [35]. All samples evaluated in this study were obtained before ARV therapy. One sample (SC)  
437 from a treatment-experienced individual was also available in the laboratory [31].

### 438 **Envelope isolation, virus stock production, cell lines and antibodies.**

439 Full-length Envs were amplified from each plasma sample using SGA as described previously  
440 [34]. Chimeric Envs were produced using an overlapping PCR strategy. Specific primer  
441 sequence and PCR conditions are available upon request. Amplified Envs were incorporated

442 into a HIV-1 NL4-3 backbone to make full-length replication competent viruses using yeast gap-  
443 repair homologous recombination as described previously [60]. Briefly, virus stocks were  
444 generated by co-transfecting human epithelial kidney (HEK) 293T with a plasmid containing the  
445 Env of interest and a helper plasmid. Virus stocks were passaged in peripheral blood  
446 mononuclear cells (PBMCs) obtained from HIV-1 seronegative donors for a maximum of 7 days.  
447 Viral titers were determined using TZM-bl cells as described previously [34]. All cell lines and  
448 antibodies were obtained from the NIH AIDS Reference Reagent Program.

#### 449 **Genotype prediction, co- receptor usage and sequence analysis**

450 Each SGA Env co-receptor phenotype was predicted from the V3 loop sequence using either  
451 WebPSSM [21] or Geno2Pheno at a false predication rate of 5% [22]. Phenotypic co-receptor  
452 usage was determined by infecting TZM-bl cells in the presence or absence of TAK779 and/or  
453 AMD3100 as described previously [34]. All assays were performed along with Envs with known  
454 co-receptor phenotype. No Env showed replication in the presence of both inhibitors, and thus  
455 this confirmed that the viruses only entered cells by using one or both of the receptors. Env  
456 amplified products were cleaned using ExoSap IT (Affymetrix), and sequences were determined  
457 using Sanger sequencing.

#### 458 **Neutralization assay.**

459 Neutralization sensitivity was tested by assessing infection of TZM-bl cells in the presence or  
460 absence of serial dilution of plasma or bnAb as described previously [34]. All plasma was heat  
461 inactivated at 56° for 1hr to prevent subsequent complement mediated inhibition. Area under the  
462 curve was calculated as described [36]. None of the plasma or antibody demonstrated  
463 neutralization against HIV-1 Env deleted pseudovirions with vesicular stomatitis virus G  
464 envelope protein, suggesting there was no non-specific inhibition.

465 Neutralization against the global reference Env and the CXCR4-using Env panel was  
466 assessed only at one plasma dilution (1:50). BP score were calculated using the equation as  
467 described previously [30].

$$468 \quad BP = \sum \log_2(\% \text{ neutralization} / 100) / 11.$$

469 A score of 0 represents no neutralization and a score of 1 represents 100% neutralization. Heat  
470 maps were generated using the Los Alamos HIV sequence database heat map tool  
471 (<https://www.hiv.lanl.gov/>). All heat maps used hierarchical clustering with the Euclidean  
472 distance method.

### 473 **Structural modeling and docking**

474 Models of X4- and R5-utilizing V3 loops were produced using Rosetta software made available  
475 by Robetta Structural Prediction Server online [61]. Model 1, the best model based on ProQ2  
476 rank, was selected for each V3 loop. Docking of the CCR5 chemokine receptor with R5 and X4  
477 V3 loops were done using Cluspro [39]. All superimpositions were done using PyMOL software  
478 (Schrödinger LLC version 2.2.2). Table S4 lists the HIV-1 template chosen by the server to  
479 predict the V3 loop structure.

480 Env homology models were generated using SWISS MODEL with BG505 SOSIP.664 as  
481 the user input template [40]. Env homology models were superimposed with the PGT121  
482 precursor, 3H+109L (PDB ID 5CEZ) or 10-1074 (PDB ID 5T3X) using PyMOL software  
483 (Schrodinger LLC version 2.2.2). Contact surface area was generated using an open source  
484 code available at [https://pymolwiki.org/index.php/Contact\\_Surface](https://pymolwiki.org/index.php/Contact_Surface).

### 485 **Statistical Analysis**

486 Comparisons were done among all Los Alamos CATNAP database Envs with previous  
487 neutralization data against specific bnAbs. Envs with phenotypically-defined CXCR4-usage

488 were compared to those with exclusive CCR5 usage. Detectable versus undetectable  
489 neutralization sensitivity was defined based on the presence of an estimated  $IC_{50}$  less than or  
490 greater than the highest tested antibody concentration respectively. Envs with undetectable  
491  $IC_{50}$  were assigned a value of 100 ug/ml for statistical comparisons. Env receptor usage and  
492 CSA was estimated for all Envs with available sequence data, a predicted glycan at the Env 332  
493 site, and neutralization data against 10-1074 and PGT121. Co-receptor usage was predicted  
494 using CRUSH (CoReceptor USage prediction for HIV-1) web tool [20].

495 Comparisons between groups containing independent data points or matched samples  
496 were done using the Mann-Whitney test and the Wilcoxon matched-pairs test respectively.  
497 Frequency differences were examined using two-sample test of proportions. Associations were  
498 estimated using Spearman rank correlations. ROC were estimated by separating Envs into  
499 groups with  $IC_{50}$  greater and less than 2 ug/ml. Statistical analyses were done using GraphPad  
500 Prism 5 (version 5). All p-values are based on two sided tests.

501 CRUSH and CSA prediction characteristics were also examined using logistic  
502 regression. In this analysis, CSA and CRUSH were examined as predictors of having an  $IC_{50}$   
503 greater than or less than 2 ug/ml. Results were assessed using 2-fold cross validation and  
504 repeated 1000 times. The results using this analysis were not significantly different as compared  
505 to the ROC evaluation. In addition, multi-variate logistic regression analysis with both CSA and  
506 CRUSH did not improve prediction.

507 **Acknowledgements**

508 We would like to thank all of the ACTG Study A5095 participants. We thank Laura White and  
509 Wenqing Jiang (Providence/Boston Center for AIDS Research biostatistics core) for helpful  
510 discussions. We thank Budhi Sagar for technical insights.



511 **REFERENCES**

- 512 1. Bar-On Y, Gruell H, Schoofs T, Pai JA, Nogueira L, et al. (2018) Safety and antiviral activity of  
513 combination HIV-1 broadly neutralizing antibodies in viremic individuals. *Nat Med* 24: 1701-  
514 1707.
- 515 2. Caskey M, Klein F, Lorenzi JC, Seaman MS, West AP, Jr., et al. (2015) Viraemia suppressed in HIV-1-  
516 infected humans by broadly neutralizing antibody 3BNC117. *Nature* 522: 487-491.
- 517 3. Caskey M, Schoofs T, Gruell H, Settler A, Karagounis T, et al. (2017) Antibody 10-1074 suppresses  
518 viremia in HIV-1-infected individuals. *Nat Med* 23: 185-191.
- 519 4. Mendoza P, Gruell H, Nogueira L, Pai JA, Butler AL, et al. (2018) Combination therapy with anti-HIV-1  
520 antibodies maintains viral suppression. *Nature* 561: 479-484.
- 521 5. Lynch RM, Boritz E, Coates EE, DeZure A, Madden P, et al. (2015) Virologic effects of broadly  
522 neutralizing antibody VRC01 administration during chronic HIV-1 infection. *Sci Transl Med* 7:  
523 319ra206.
- 524 6. Bar KJ, Sneller MC, Harrison LJ, Justement JS, Overton ET, et al. (2016) Effect of HIV Antibody VRC01  
525 on Viral Rebound after Treatment Interruption. *N Engl J Med* 375: 2037-2050.
- 526 7. Schoofs T, Klein F, Braunschweig M, Kreider EF, Feldmann A, et al. (2016) HIV-1 therapy with  
527 monoclonal antibody 3BNC117 elicits host immune responses against HIV-1. *Science* 352: 997-  
528 1001.
- 529 8. Gunthard HF, Calvez V, Paredes R, Pillay D, Shafer RW, et al. (2019) Human Immunodeficiency Virus  
530 Drug Resistance: 2018 Recommendations of the International Antiviral Society-USA Panel. *Clin*  
531 *Infect Dis* 68: 177-187.
- 532 9. McCoy LE, Burton DR (2017) Identification and specificity of broadly neutralizing antibodies against  
533 HIV. *Immunol Rev* 275: 11-20.
- 534 10. Walker LM, Phogat SK, Chan-Hui PY, Wagner D, Phung P, et al. (2009) Broad and potent neutralizing  
535 antibodies from an African donor reveal a new HIV-1 vaccine target. *Science* 326: 285-289.
- 536 11. Julien JP, Sok D, Khayat R, Lee JH, Doores KJ, et al. (2013) Broadly neutralizing antibody PGT121  
537 allosterically modulates CD4 binding via recognition of the HIV-1 gp120 V3 base and multiple  
538 surrounding glycans. *PLoS Pathog* 9: e1003342.
- 539 12. Mouquet H, Scharf L, Euler Z, Liu Y, Eden C, et al. (2012) Complex-type N-glycan recognition by  
540 potent broadly neutralizing HIV antibodies. *Proc Natl Acad Sci U S A* 109: E3268-3277.
- 541 13. McLellan JS, Pancera M, Carrico C, Gorman J, Julien JP, et al. (2011) Structure of HIV-1 gp120 V1/V2  
542 domain with broadly neutralizing antibody PG9. *Nature* 480: 336-343.
- 543 14. Lin NH, Becerril C, Giguel F, Novitsky V, Moyo S, et al. (2012) Env sequence determinants in CXCR4-  
544 using human immunodeficiency virus type-1 subtype C. *Virology* 433: 296-307.
- 545 15. Huang W, Eshleman SH, Toma J, Fransen S, Stawiski E, et al. (2007) Coreceptor tropism in human  
546 immunodeficiency virus type 1 subtype D: high prevalence of CXCR4 tropism and heterogeneous  
547 composition of viral populations. *J Virol* 81: 7885-7893.
- 548 16. Regoes RR, Bonhoeffer S (2005) The HIV coreceptor switch: a population dynamical perspective.  
549 *Trends Microbiol* 13: 269-277.
- 550 17. Pfeifer N, Walter H, Lengauer T (2014) Association between HIV-1 coreceptor usage and resistance  
551 to broadly neutralizing antibodies. *J Acquir Immune Defic Syndr* 67: 107-112.
- 552 18. Lin N, Gonzalez OA, Registre L, Becerril C, Etemad B, et al. (2016) Humoral Immune Pressure Selects  
553 for HIV-1 CXCR4-chemokine Receptor 4-using Variants. *EBioMedicine* 8: 237-247.
- 554 19. Marcelino JM, Borrego P, Nilsson C, Familia C, Barroso H, et al. (2012) Resistance to antibody  
555 neutralization in HIV-2 infection occurs in late stage disease and is associated with X4 tropism.  
556 *Aids* 26: 2275-2284.

- 557 20. Kieslich CA, Tamamis P, Guzman YA, Onel M, Floudas CA (2016) Highly Accurate Structure-Based  
558 Prediction of HIV-1 Coreceptor Usage Suggests Intermolecular Interactions Driving Tropism.  
559 PLoS One 11: e0148974.
- 560 21. Jensen MA, Li FS, van 't Wout AB, Nickle DC, Shriner D, et al. (2003) Improved coreceptor usage  
561 prediction and genotypic monitoring of R5-to-X4 transition by motif analysis of human  
562 immunodeficiency virus type 1 env V3 loop sequences. *J Virol* 77: 13376-13388.
- 563 22. Lengauer T, Sander O, Sierra S, Thielen A, Kaiser R (2007) Bioinformatics prediction of HIV coreceptor  
564 usage. *Nat Biotechnol* 25: 1407-1410.
- 565 23. Trkola A, Ketas T, Kewalramani VN, Endorf F, Binley JM, et al. (1998) Neutralization sensitivity of  
566 human immunodeficiency virus type 1 primary isolates to antibodies and CD4-based reagents is  
567 independent of coreceptor usage. *J Virol* 72: 1876-1885.
- 568 24. Montefiori DC, Collman RG, Fouts TR, Zhou JY, Bilska M, et al. (1998) Evidence that antibody-  
569 mediated neutralization of human immunodeficiency virus type 1 by sera from infected  
570 individuals is independent of coreceptor usage. *J Virol* 72: 1886-1893.
- 571 25. Cecilia D, KewalRamani VN, O'Leary J, Volsky B, Nyambi P, et al. (1998) Neutralization profiles of  
572 primary human immunodeficiency virus type 1 isolates in the context of coreceptor usage. *J*  
573 *Virol* 72: 6988-6996.
- 574 26. Bunnik EM, Quakkelaar ED, van Nuenen AC, Boeser-Nunnink B, Schuitemaker H (2007) Increased  
575 neutralization sensitivity of recently emerged CXCR4-using human immunodeficiency virus type  
576 1 strains compared to coexisting CCR5-using variants from the same patient. *J Virol* 81: 525-531.
- 577 27. Ho SH, Tasca S, Shek L, Li A, Gettie A, et al. (2007) Coreceptor switch in R5-tropic simian/human  
578 immunodeficiency virus-infected macaques. *J Virol* 81: 8621-8633.
- 579 28. Henrich TJ, McLaren PJ, Rao SS, Lin NH, Hanhauser E, et al. (2014) Genome-Wide Association Study  
580 of Human Immunodeficiency Virus (HIV)-1 Coreceptor Usage in Treatment-Naive Patients from  
581 An AIDS Clinical Trials Group Study. *Open Forum Infect Dis* 1: ofu018.
- 582 29. deCamp A, Hraber P, Bailer RT, Seaman MS, Ochsenbauer C, et al. (2014) Global panel of HIV-1 Env  
583 reference strains for standardized assessments of vaccine-elicited neutralizing antibodies. *J Virol*  
584 88: 2489-2507.
- 585 30. Ghulam-Smith M, Olson A, White LF, Chasela CS, Ellington S, et al. (2017) Maternal but Not Infant  
586 Anti-HIV-1 Neutralizing Antibody Response Associates with Enhanced Transmission and Infant  
587 Morbidity. *mBio* 8.
- 588 31. Pena-Cruz V, Agosto LM, Akiyama H, Olson A, Moreau Y, et al. (2018) HIV-1 replicates and persists in  
589 vaginal epithelial dendritic cells. *J Clin Invest*.
- 590 32. Yoon H, Macke J, West AP, Jr., Foley B, Bjorkman PJ, et al. (2015) CATNAP: a tool to compile, analyze  
591 and tally neutralizing antibody panels. *Nucleic Acids Res* 43: W213-219.
- 592 33. Louder MK, Sambor A, Chertova E, Hunte T, Barrett S, et al. (2005) HIV-1 envelope pseudotyped viral  
593 vectors and infectious molecular clones expressing the same envelope glycoprotein have a  
594 similar neutralization phenotype, but culture in peripheral blood mononuclear cells is associated  
595 with decreased neutralization sensitivity. *Virology* 339: 226-238.
- 596 34. Etemad B, Ghulam-Smith M, Gonzalez O, White LF, Sagar M (2015) Single genome amplification and  
597 standard bulk PCR yield HIV-1 envelope products with similar genotypic and phenotypic  
598 characteristics. *J Virol Methods* 214: 46-53.
- 599 35. Gulick RM, Ribaldo HJ, Shikuma CM, Lustgarten S, Squires KE, et al. (2004) Triple-nucleoside  
600 regimens versus efavirenz-containing regimens for the initial treatment of HIV-1 infection. *N*  
601 *Engl J Med* 350: 1850-1861.
- 602 36. Yu X, Gilbert PB, Hioe CE, Zolla-Pazner S, Self SG (2012) Statistical approaches to analyzing HIV-1  
603 neutralizing antibody assay data. *Stat Biopharm Res* 4: 1-13.

- 604 37. Tan Q, Zhu Y, Li J, Chen Z, Han GW, et al. (2013) Structure of the CCR5 chemokine receptor-HIV entry  
605 inhibitor maraviroc complex. *Science* 341: 1387-1390.
- 606 38. Tamamis P, Floudas CA (2014) Molecular recognition of CCR5 by an HIV-1 gp120 V3 loop. *PLoS One*  
607 9: e95767.
- 608 39. Kozakov D, Hall DR, Xia B, Porter KA, Padhorny D, et al. (2017) The ClusPro web server for protein-  
609 protein docking. *Nat Protoc* 12: 255-278.
- 610 40. Waterhouse A, Bertoni M, Bienert S, Studer G, Tauriello G, et al. (2018) SWISS-MODEL: homology  
611 modelling of protein structures and complexes. *Nucleic Acids Res* 46: W296-W303.
- 612 41. Garces F, Lee JH, de Val N, de la Pena AT, Kong L, et al. (2015) Affinity Maturation of a Potent Family  
613 of HIV Antibodies Is Primarily Focused on Accommodating or Avoiding Glycans. *Immunity* 43:  
614 1053-1063.
- 615 42. Gristick HB, von Boehmer L, West AP, Jr., Schamber M, Gazumyan A, et al. (2016) Natively  
616 glycosylated HIV-1 Env structure reveals new mode for antibody recognition of the CD4-binding  
617 site. *Nat Struct Mol Biol* 23: 906-915.
- 618 43. Vangone A, Bonvin AM (2015) Contacts-based prediction of binding affinity in protein-protein  
619 complexes. *Elife* 4: e07454.
- 620 44. Gruell H, Klein F (2018) Antibody-mediated prevention and treatment of HIV-1 infection.  
621 *Retrovirology* 15: 73.
- 622 45. Brumme ZL, Goodrich J, Mayer HB, Brumme CJ, Henrick BM, et al. (2005) Molecular and clinical  
623 epidemiology of CXCR4-using HIV-1 in a large population of antiretroviral-naive individuals. *J*  
624 *Infect Dis* 192: 466-474.
- 625 46. Moyle GJ, Wildfire A, Mandalia S, Mayer H, Goodrich J, et al. (2005) Epidemiology and predictive  
626 factors for chemokine receptor use in HIV-1 infection. *J Infect Dis* 191: 866-872.
- 627 47. Chandramouli B, Chillemi G, Giombini E, Capobianchi MR, Rozera G, et al. (2013) Structural dynamics  
628 of V3 loop with different electrostatics: implications on co-receptor recognition: a molecular  
629 dynamics study of HIV gp120. *J Biomol Struct Dyn* 31: 403-413.
- 630 48. Sander O, Sing T, Sommer I, Low AJ, Cheung PK, et al. (2007) Structural descriptors of gp120 V3 loop  
631 for the prediction of HIV-1 coreceptor usage. *PLoS Comput Biol* 3: e58.
- 632 49. Bozek K, Lengauer T, Sierra S, Kaiser R, Domingues FS (2013) Analysis of physicochemical and  
633 structural properties determining HIV-1 coreceptor usage. *PLoS Comput Biol* 9: e1002977.
- 634 50. Pastore C, Ramos A, Mosier DE (2004) Intrinsic obstacles to human immunodeficiency virus type 1  
635 coreceptor switching. *J Virol* 78: 7565-7574.
- 636 51. Tasca S, Ho SH, Cheng-Mayer C (2008) R5X4 viruses are evolutionary, functional, and antigenic  
637 intermediates in the pathway of a simian-human immunodeficiency virus coreceptor switch. *J*  
638 *Virol* 82: 7089-7099.
- 639 52. Sagar M, Wu X, Lee S, Overbaugh J (2006) Human immunodeficiency virus type 1 V1-V2 envelope  
640 loop sequences expand and add glycosylation sites over the course of infection, and these  
641 modifications affect antibody neutralization sensitivity. *J Virol* 80: 9586-9598.
- 642 53. Rong R, Bibollet-Ruche F, Mulenga J, Allen S, Blackwell JL, et al. (2007) Role of V1V2 and other  
643 human immunodeficiency virus type 1 envelope domains in resistance to autologous  
644 neutralization during clade C infection. *J Virol* 81: 1350-1359.
- 645 54. Moore PL, Gray ES, Choge IA, Ranchohe N, Mlisana K, et al. (2008) The c3-v4 region is a major target  
646 of autologous neutralizing antibodies in human immunodeficiency virus type 1 subtype C  
647 infection. *J Virol* 82: 1860-1869.
- 648 55. Gorny MK, Xu JY, Karwowska S, Buchbinder A, Zolla-Pazner S (1993) Repertoire of neutralizing  
649 human monoclonal antibodies specific for the V3 domain of HIV-1 gp120. *J Immunol* 150: 635-  
650 643.

- 651 56. Tang H, Robinson JE, Gnanakaran S, Li M, Rosenberg ES, et al. (2011) Epitopes immediately below  
652 the base of the V3 loop of gp120 as targets for the initial autologous neutralizing antibody  
653 response in two HIV-1 subtype B-infected individuals. *J Virol* 85: 9286-9299.
- 654 57. Garces F, Sok D, Kong L, McBride R, Kim HJ, et al. (2014) Structural evolution of glycan recognition by  
655 a family of potent HIV antibodies. *Cell* 159: 69-79.
- 656 58. Pinter A, Honnen WJ, He Y, Gorny MK, Zolla-Pazner S, et al. (2004) The V1/V2 domain of gp120 is a  
657 global regulator of the sensitivity of primary human immunodeficiency virus type 1 isolates to  
658 neutralization by antibodies commonly induced upon infection. *J Virol* 78: 5205-5215.
- 659 59. Sagar M, Wu X, Lee S, Overbaugh J (2006) HIV-1 V1-V2 envelope loop sequences expand and add  
660 glycosylation sites over the course of infection and these modifications affect antibody  
661 neutralization sensitivity. *J Virol* 80: 9586-9598.
- 662 60. Chatziandreou N, Arauz AB, Freitas I, Nyein PH, Fenton G, et al. (2012) Sensitivity changes over the  
663 course of infection increases the likelihood of resistance against fusion but not CCR5 receptor  
664 blockers. *AIDS Res Hum Retroviruses* 28: 1584-1593.
- 665 61. Song Y, DiMaio F, Wang RY, Kim D, Miles C, et al. (2013) High-resolution comparative modeling with  
666 RosettaCM. *Structure* 21: 1735-1742.

667

## Figure Captions

**Fig. 1. Samples containing CXCR4-using or those with CCR5 only viruses have similar neutralization potency and breadth but plasmas have decreased ability to neutralize CXCR4-using as compared to R5 strains. (A and D)** Heatmaps show plasma neutralization against the R5 global reference Env panel **(A)** and CXCR4-using Env collection **(D)**. Each square in the heat map represents the average percent neutralization for each Env-plasma combination tested: <50% (yellow); 50-70% (light orange); 70-90% (dark orange); >90% (red). On the left, blue and red denotes DM and R5 only plasma respectively, and individual plasma IDs are listed on the right. Env subtypes above the heatmaps are indicated by color: A (khaki); B (gray); C (teal); G (green); AC (pink); CRF01\_AE (dark green); and CRF07\_BC (purple). The branches show the hierarchical clustering with bootstrap probability for 100 iterations. **(B and E)** Breadth and potency (BP) score for DM (blue) and CCR5 only plasma (red) against the global Env panel **(B)** and CXCR-using Env collection **(E)**. **(C and F)** Breadth (% of Envs neutralized at greater than 50% at the highest tested plasma dilution) observed for the DM (blue) and CCR5 only plasma (red) against the global Env panel **(C)** and CXCR4-using Env collection **(F)**. Comparisons done using Wilcoxon rank-sum test. **(G and H)** Plasma BP score **(G)** and breadth **(H)** against the global as compared to the CXCR4-using Env panel. In G and H, each unique plasma sample is denoted by a different color/symbol. Comparisons done using matched-pairs Wilcoxon rank-sum test. In all box plots, values are a mean from a minimum of 2 independent assays. In each box plot, lines denotes median and interquartile range. Stars denote p-value less than 0.05.

**Fig. 2. CXCR4-using as compared to R5 strains are less susceptible to heterologous antibodies and V1-V2 and V3 directed bnAbs. (A – D)** Neutralization  $IC_{50}$ s available in the Los Alamos CATNAP database among R5 (red) and CXCR4-using (blue) strains against PGT121 **(A)** PG9 **(B)**, PG16 **(C)**, and VRC01 **(D)**. In these analyses, a variant with an  $IC_{50}$  above the highest tested bnAb dilution was assigned a value of 100. **(E)** Neutralization area under the curve (AUC) (y-axis) among primary R5 (red) and X4 (blue) Env against a heterologous plasma pool. **(F – K)** Neutralization AUC (y-axis) for primary R5 (red) and X4 (blue) Envs against PGT121 **(F)**, 10-1074 **(G)**, PG9 **(H)**, PG16 **(I)**, VRC01 **(J)**, and 10E8 **(K)**. Each point denotes a unique Env and the value represents mean from duplicate independent experiments. Among all the dot plots **(A – J)**, lines denotes median and interquartile range. All comparisons done using Wilcoxon rank-sum test. Stars denote p-value less than 0.05.

**Fig. 3. X4 V3 loops contain a protrusion that impairs CCR5 binding.** Figures **A - E** depict superimposed predicted X4 (blue) and R5 (red) V3 loop structures. Location of the observed insertions and amino acid substitutions are depicted in green. ID below each predicted structure indicates the identity of the subject for the X4 V3 loop and either a co-circulating or heterologous R5 V3 loop. **(F)** Interaction of a predicted 4102-X4 V3 loop structure (purple) on the predicted 4102-R5 V3 loop – CCR5 (light blue) model. Predicted steric clash at positions 279 and 280 are highlighted in cyan. Stick configuration at the tip of the V3 loop shows the three-amino acid insertion (green) observed in the 4102 X4 Env. Interaction of 3248 **(G)** and 1924 **(H)** X4 V3 loop (purple) with the CCR5 receptor (light blue). Stick configuration shows the insertions and amino acid insertions (green) observed in these X4 Envs and amino acids Glu18 and Asp11 of the CCR5 receptor. Black dashes represent hydrogen bonds that were absent in this model compared to the 4102-R5 V3 loop and CCR5 structure (Fig. S3).

**Fig. 4. Orientation of V1 loop influences neutralization sensitivity to anti-V3 loop antibodies.** Homology models of 3H+109L, a precursor to PGT121, (magenta) **(A and B)** and 10-1074 bnAb (magenta) **(C and D)** interaction with relatively sensitive R5 (4102\_61 **(A and C)** and 4102-2\_17 **(B and D)**) (red) and less susceptible X4 (4102-3\_6 **(A and C)** and 4102-3\_5 **(B and D)**) (blue) Envs. The black spheres in each structure highlight the predicted N332 site. The blue spheres show the V3 loop insertions in the X4 as compared to the R5 strains.

**Fig. 5. Sequence-dependent co-receptor utilization and contact between V1 loop and antibody predict neutralization sensitivity.**

**(A and B)** Correlation between estimated V1 loop and 3H+109L **(A)** and 10-1074 **(B)** CSA (x-axis) and PGT121 **(A)** and 10-1074 **(B)** neutralization area under the curve (AUC) (y-axis) for subject 4102 original R5 (red circles) and X4 (blue circles) Envs and chimeric R5 (red squares) and X4 (blue squares) Envs. **(C and D)** Correlation between V1 loop and 3H+109L **(C)** and 10-1074 **(D)** CSA (x-axis) and  $IC_{50}$  (y – axis) among all CATNAP Envs with detectable neutralization. **(A – D)** Graphs shows Spearman rank correlation. **(E and F)** Receiver operating curve (ROC) showing CRUSH (red) and CSA (blue) in predicting Envs with greater than versus less than 2 ug/ml PGT121 **(E)** and 10-1074 **(F)**  $IC_{50}$ . The black line is the line of identity. **(G and H)** Columns depict number of Envs (y-axis) with the defined characteristic (x-axis) that had  $IC_{50}$  greater than

(blue) or less than 2 ug/ml (red) for PGT121 (**G**) and 10-1074 (**H**). Numbers above the bars denote the percent of Envs with a documented IC<sub>50</sub> above 2ug/ml.

## Supplementary Materials

Fig. S1. Correlation between  $IC_{50}$  and neutralization area under the curve.

Fig. S2. Predicted amino acid Env sequence alignment.

Fig. S3. Predicted interaction between CCR5 and a R5 V3 loop.

Fig. S4. Predicted PGT121 and 3H+109L Env complex.

Supplementary Table 1. Samples with R5 only and dual-mixed virus population.

Supplementary Table 2. Envelopes in the CXCR4-using Env panel.

Supplementary Table 3. Variants in the primary X4 and R5 Env panel.

Supplementary Table 4. Templates for homology modeling for X4 and R5 V3 loops.



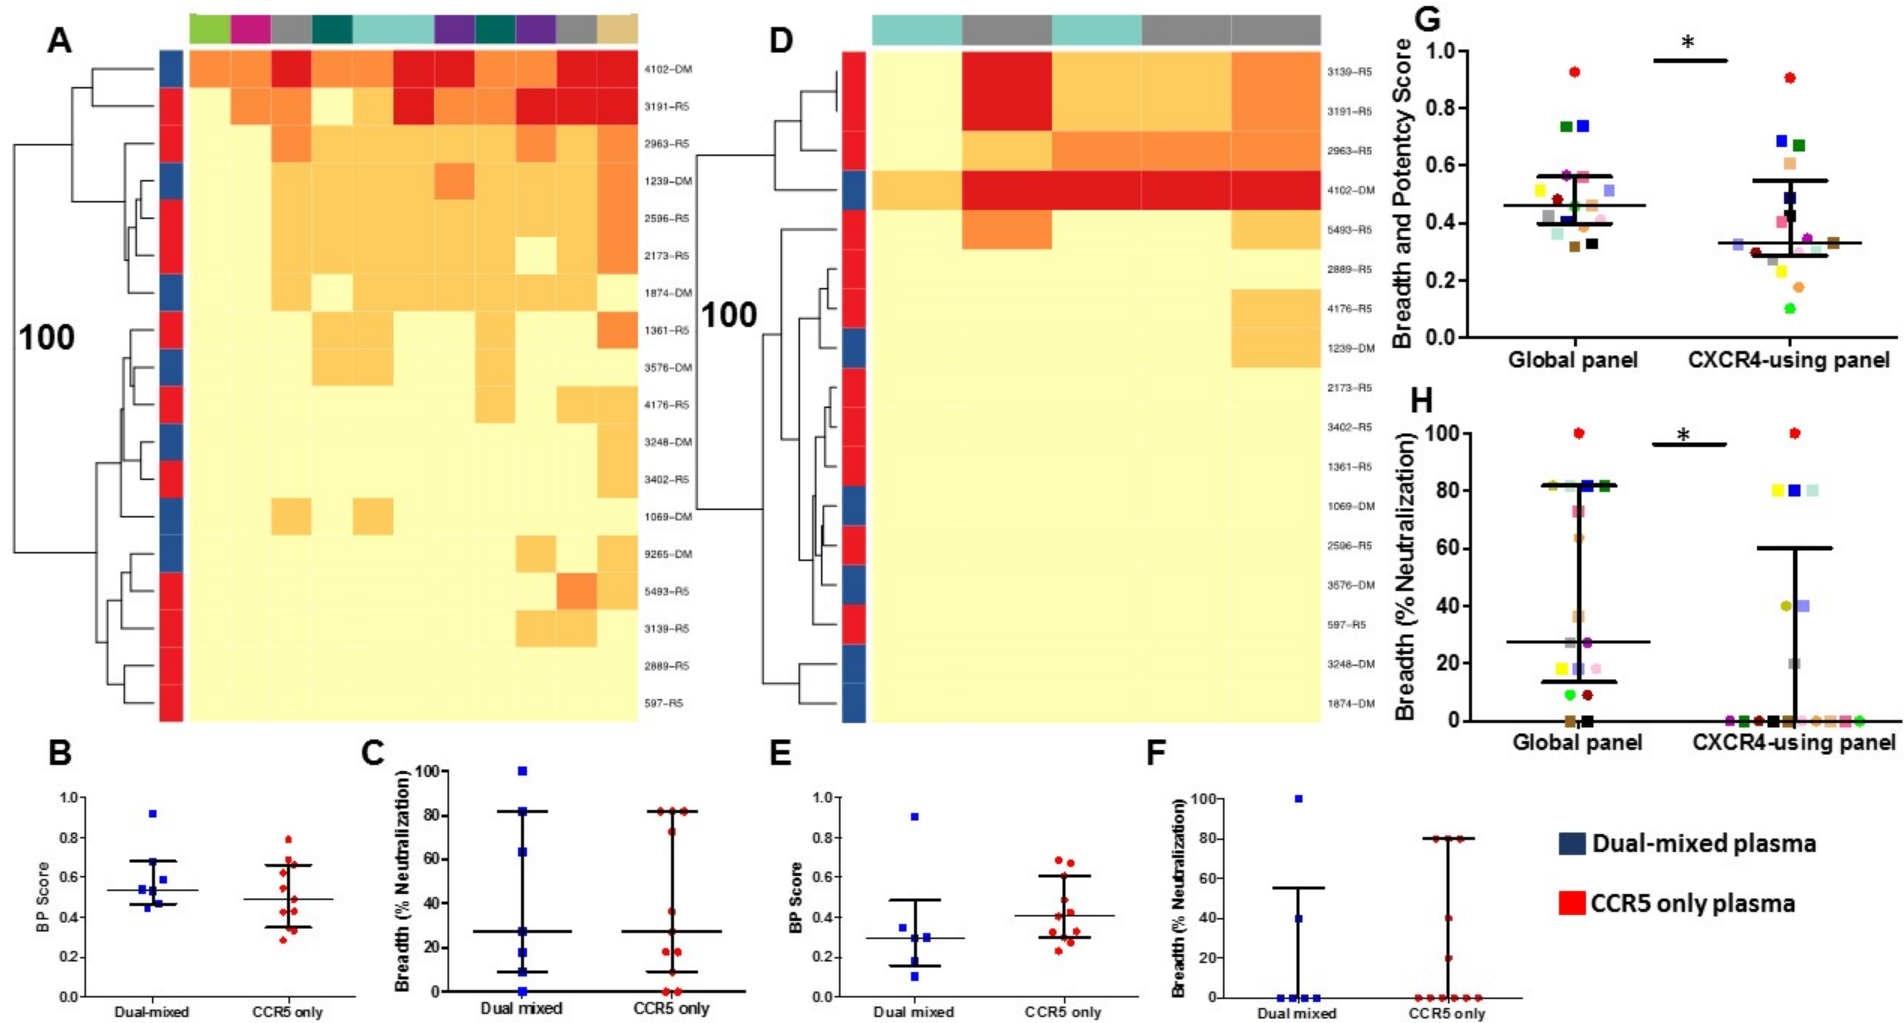

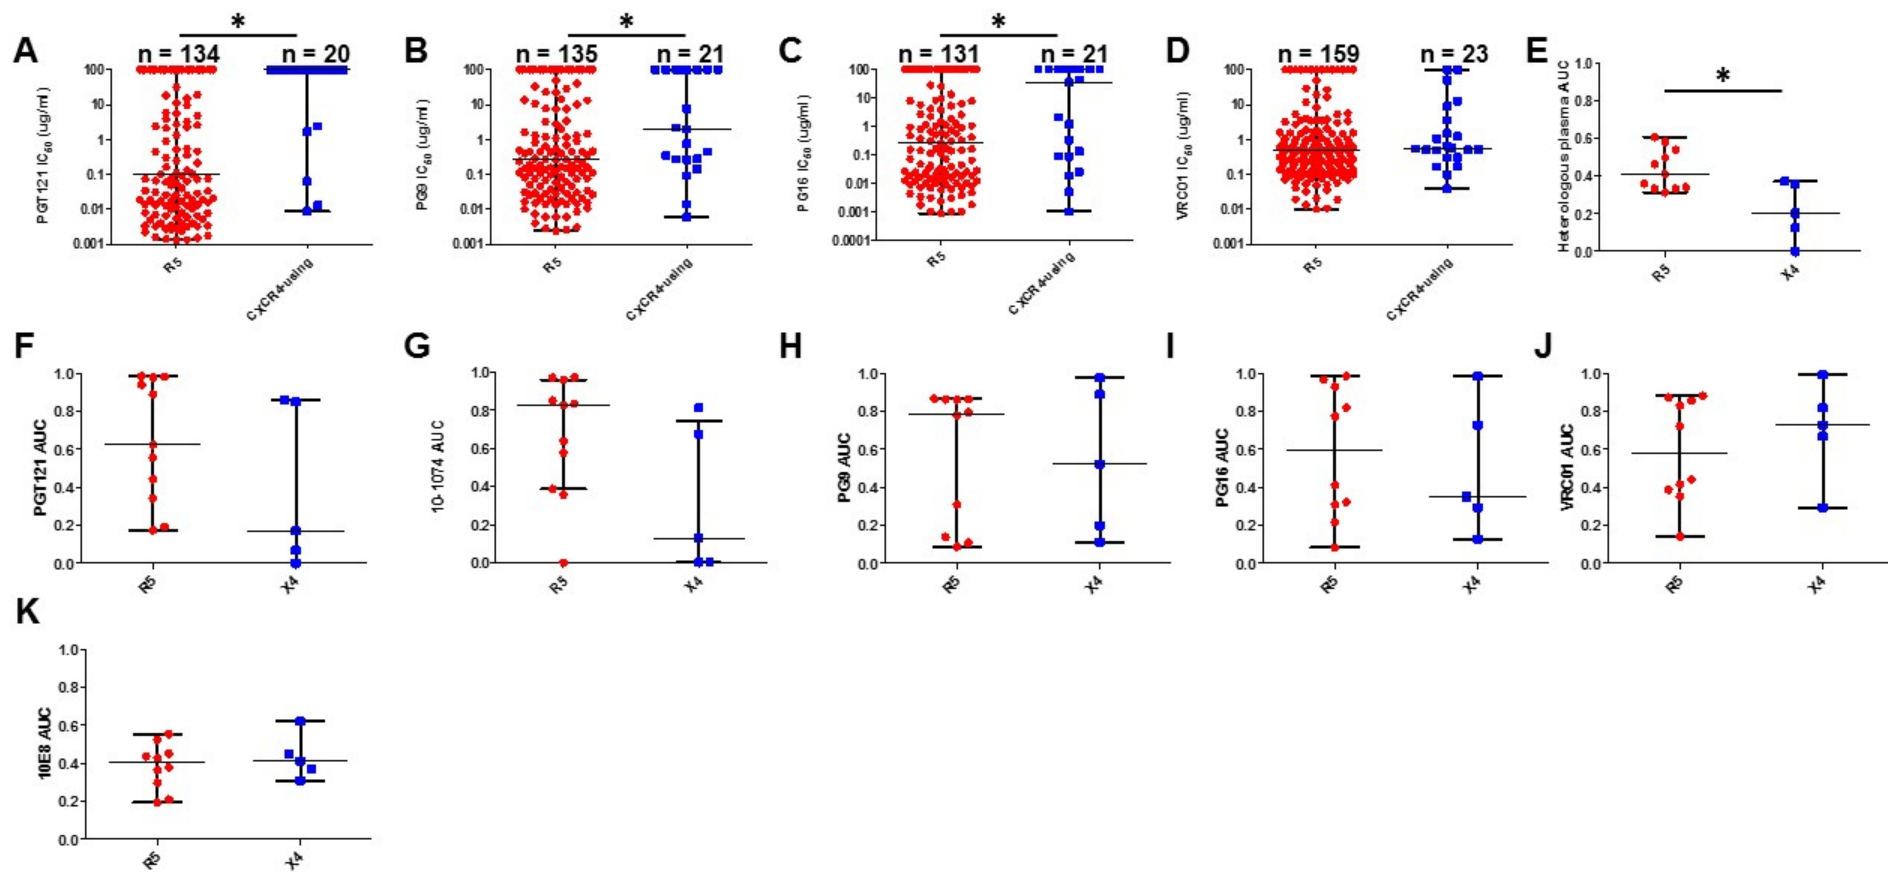

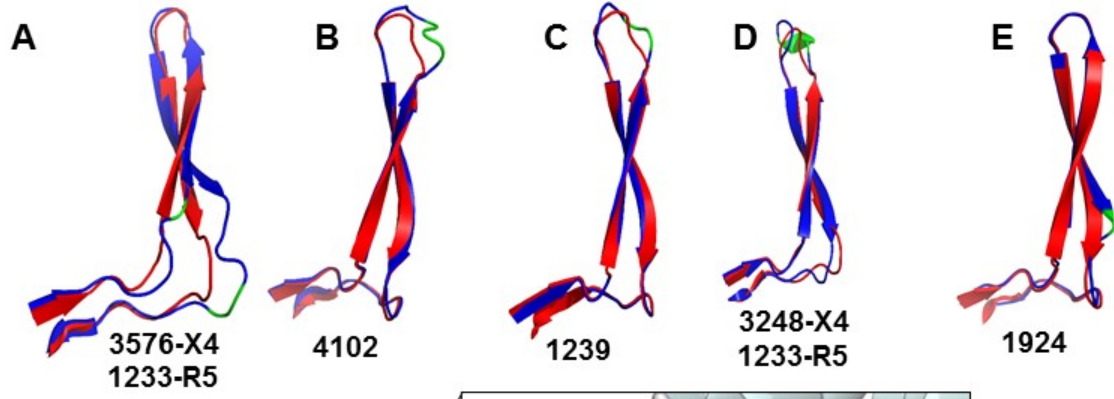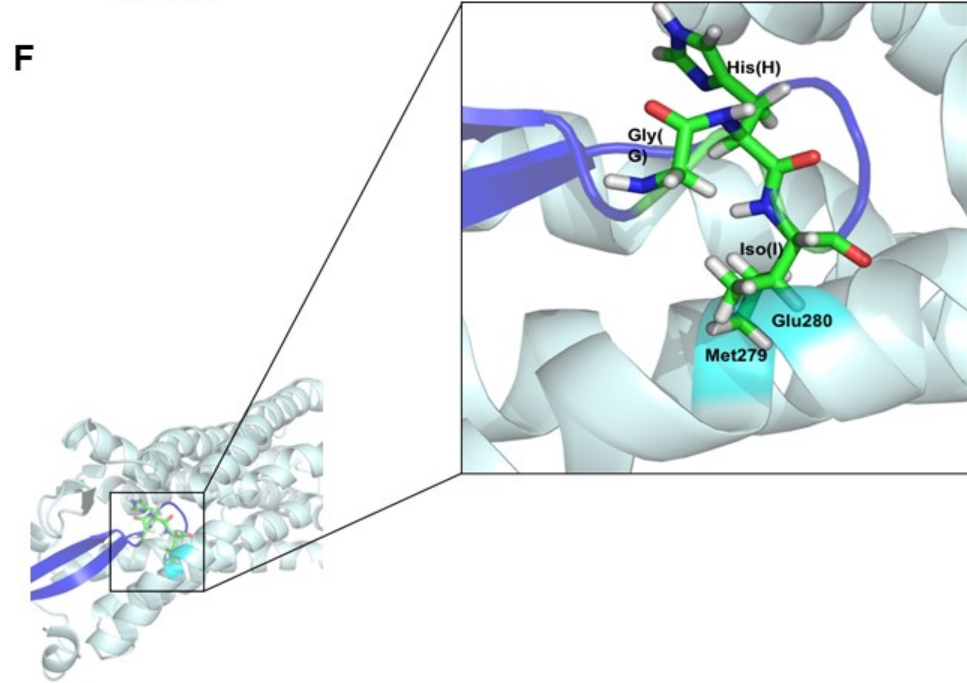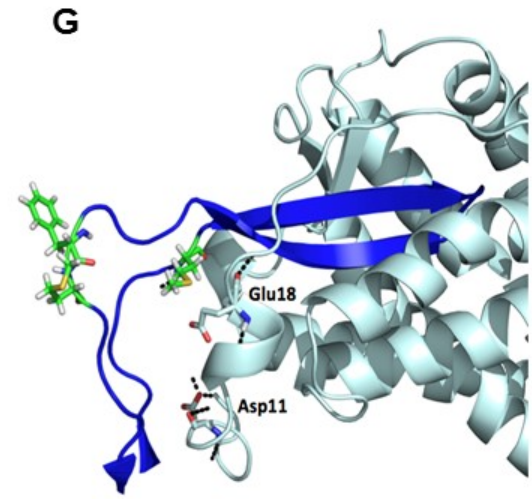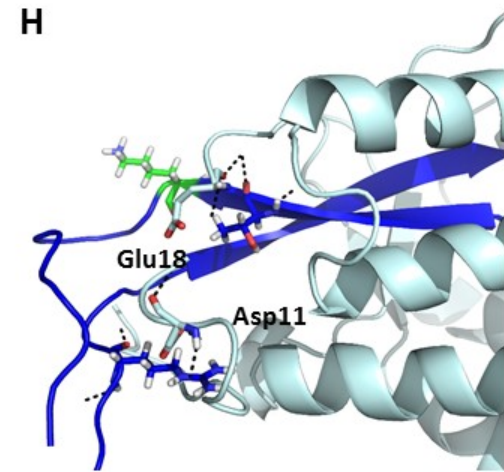

**A**

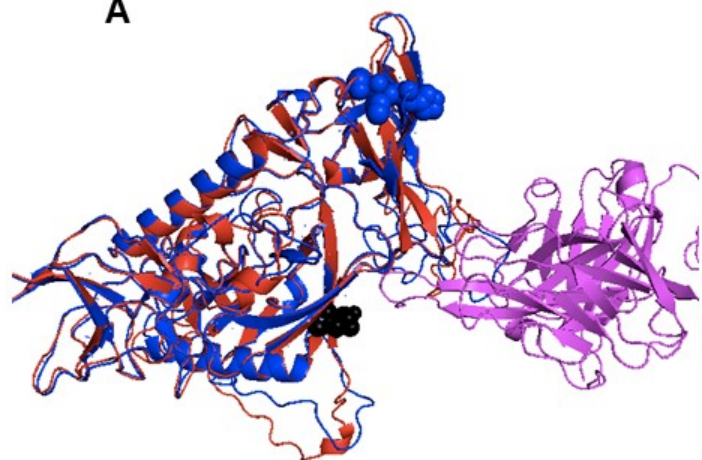

**B**

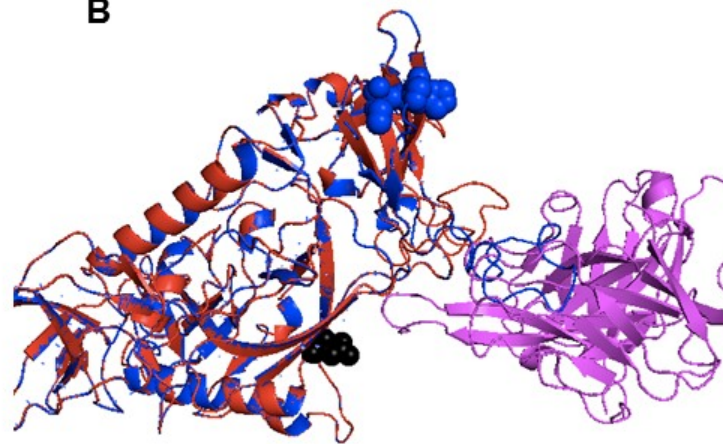

**C**

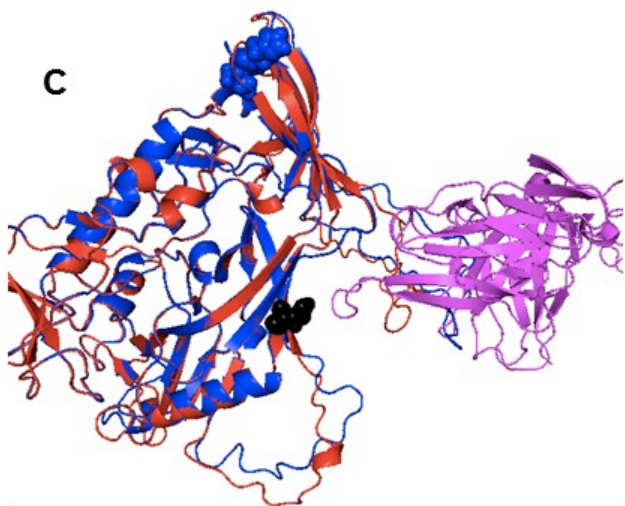

**D**

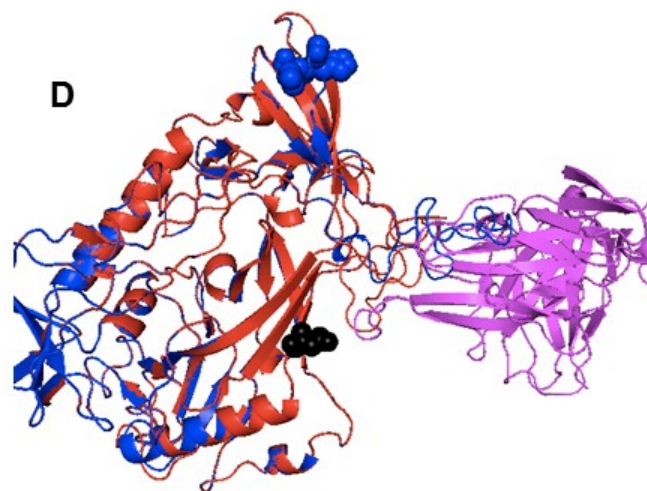

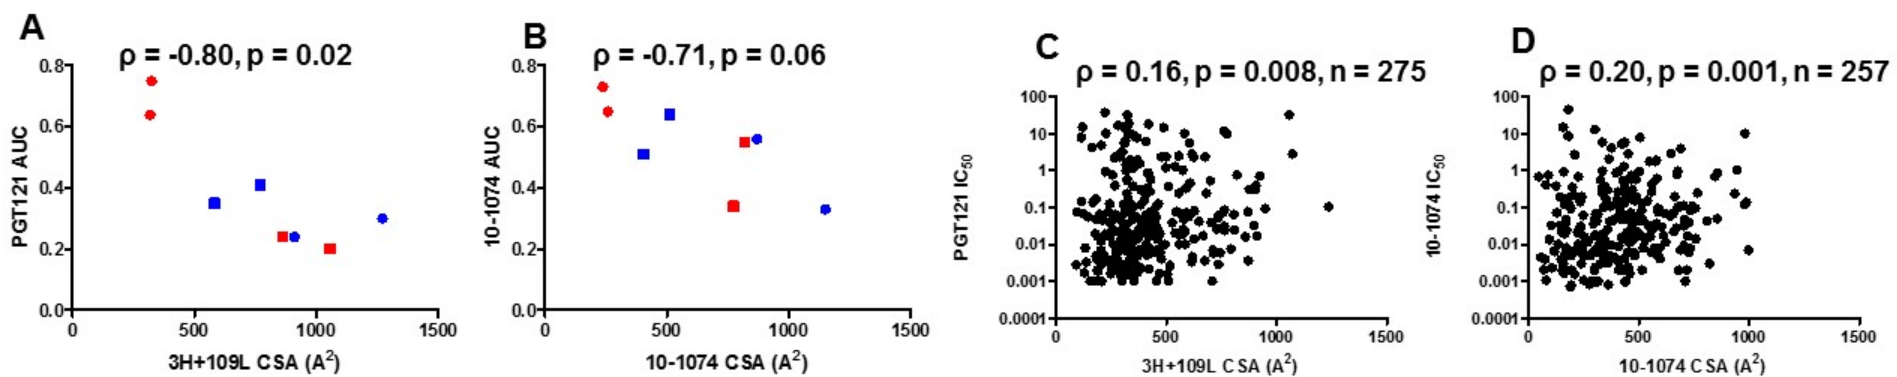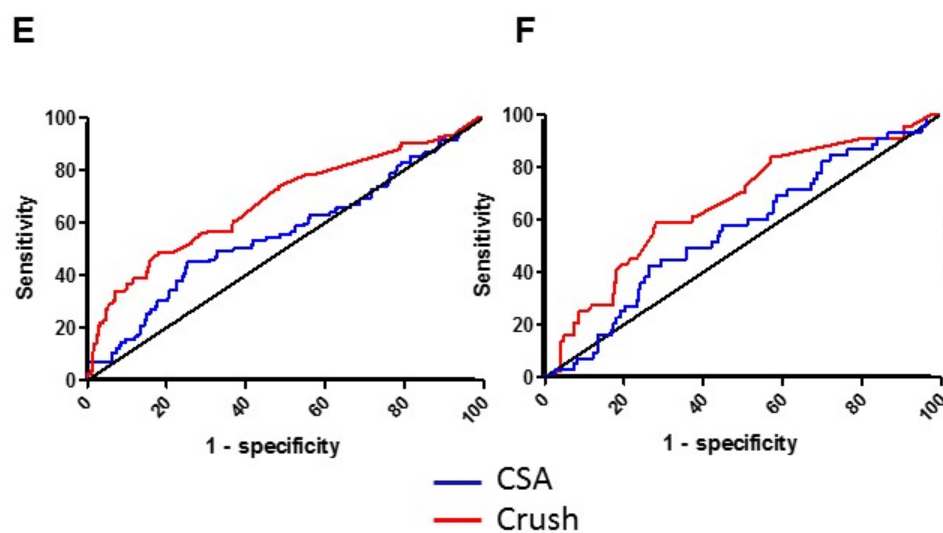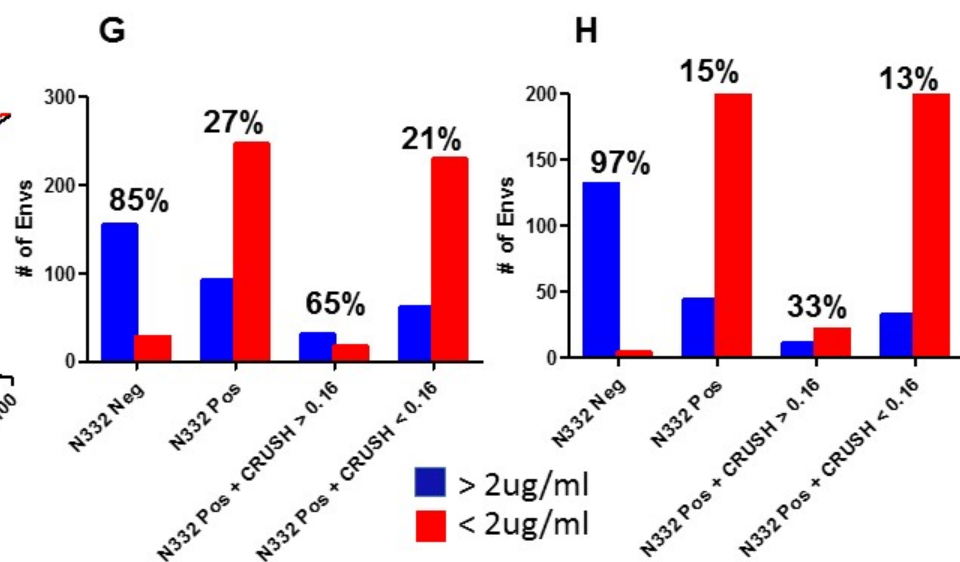

Source: https://biorxiv.org/content/biorxiv/early/2019/03/05/568469.full-text.pdf
